# Supplementary material for: Dissecting antibody-dependent enhancement modulation by Fc-modified cross-neutralizing human monoclonal antibody
Source: PeerJ. 2025 Nov 19;13:e20329. doi: 10.7717/peerj.20329 (PMC12640126; doi:10.7717/peerj.20329)
Supplement: Supplemental Information 1 [file peerj-13-20329-s001.xlsx]

## Sheet: Sheet1
CALCULATED RESULTS
CALCULATION PLATE MAP
	1	2	3	4	5	6	7	8	9	10	11	12
A	B	B	B	U1	U1	U9	U9	U17	U17	U25	U25	U33
B	S1	S1	C1	U2	U2	U10	U10	U18	U18	U26	U26	U33
C	S2	S2	C1	U3	U3	U11	U11	U19	U19	U27	U27	U34
D	S3	S3	C2	U4	U4	U12	U12	U20	U20	U28	U28	U34
E	S4	S4	C2	U5	U5	U13	U13	U21	U21	U29	U29	U35
F	S5	S5	S5	U6	U6	U14	U14	U22	U22	U30	U30	U35
G	S6	S6	S6	U7	U7	U15	U15	U23	U23	U31	U31	U36
H	S7	S7	S7	U8	U8	U16	U16	U24	U24	U32	U32	U36
SAMPLE CONCENTRATIONS
Standard 1 (S1):	2.7	nM
Standard 2 (S2):	8.2	nM
Standard 3 (S3):	24.7	nM
Standard 4 (S4):	74	nM
Standard 5 (S5):	222.2	nM
Standard 6 (S6):	666.7	nM
Standard 7 (S7):	2000	nM
Control 1 (C1):	0	nM
Control 2 (C2):	0	nM
CALCULATION OPERATION	1	General Calculation
OUTPUT NAME	Ratio 1
CALCULATION OPERATION DETAILS
INPUT X	TRF - EndPoint (Filter 1)
INPUT Y	TRF - EndPoint (2) (Filter 1)
OPERATOR	/
CALCULATION OPERATION RESULTS
	1	2	3	4	5	6	7	8	9	10	11	12
A	1.03177	1.06309	1.10847	0.501534	0.527294	0.420589	0.518558	0.537685	0.465524	0.495615	0.564111	0.473594
B	0.506297	0.539142	0.0714948	0.510176	0.506863	0.522192	0.466697	0.507406	0.545289	0.525407	0.572468	0.479557
C	0.533414	0.531091	0.0780512	0.503872	0.559453	0.516864	0.517548	0.532767	0.542284	0.306532	0.332025	0.502199
D	0.498906	0.476794	0.5346	0.566178	0.0815777	0.476384	0.535797	0.473906	0.463364	0.365068	0.375401	0.52935
E	0.409036	0.420878	0.534061	0.545283	0.557343	0.493205	0.543104	0.499659	0.562116	0.470713	0.462258	0.336328
F	0.316379	0.234682	0.291558	0.571519	0.532814	0.551525	0.519178	0.503626	0.562079	0.526518	0.472262	0.372268
G	0.230409	0.236261	0.211543	0.528759	0.590926	0.560874	0.501793	0.472621	0.521887	0.286728	0.283006	0.437028
H	0.15986	0.143542	0.142268	0.542042	0.599124	0.536826	0.539476	0.506767	0.46689	0.357377	0.341263	0.411525
CALCULATION OPERATION	2	General Calculation (2)
OUTPUT NAME	Ratio
CALCULATION OPERATION DETAILS
INPUT X	General Calculation
INPUT Y	10000
OPERATOR	*
CALCULATION OPERATION RESULTS
	1	2	3	4	5	6	7	8	9	10	11	12
A	10317.7	10630.9	11084.7	5015.34	5272.94	4205.89	5185.58	5376.85	4655.24	4956.15	5641.11	4735.94
B	5062.97	5391.42	714.948	5101.76	5068.63	5221.92	4666.97	5074.06	5452.89	5254.07	5724.68	4795.57
C	5334.14	5310.91	780.512	5038.72	5594.53	5168.64	5175.48	5327.67	5422.84	3065.32	3320.25	5021.99
D	4989.06	4767.94	5346	5661.78	815.777	4763.84	5357.97	4739.06	4633.64	3650.68	3754.01	5293.5
E	4090.36	4208.78	5340.61	5452.83	5573.43	4932.05	5431.04	4996.59	5621.16	4707.13	4622.58	3363.28
F	3163.79	2346.82	2915.58	5715.19	5328.14	5515.25	5191.78	5036.26	5620.79	5265.18	4722.62	3722.68
G	2304.09	2362.61	2115.43	5287.59	5909.26	5608.74	5017.93	4726.21	5218.87	2867.28	2830.06	4370.28
H	1598.6	1435.42	1422.68	5420.42	5991.24	5368.26	5394.76	5067.67	4668.9	3573.77	3412.63	4115.25
CALCULATION OPERATION	3	Blank Correction
OUTPUT NAME	delta Ratio
CALCULATION OPERATION DETAILS
INPUT	General Calculation (2)
CALCULATION OPERATION RESULTS
	1	2	3	4	5	6	7	8	9	10	11	12
A	-360.022	-46.8866	406.908	-5662.41	-5404.81	-6471.86	-5492.17	-5300.89	-6022.51	-5721.6	-5036.64	-5941.81
B	-5614.78	-5286.33	-9962.8	-5575.99	-5609.11	-5455.83	-6010.78	-5603.69	-5224.86	-5423.68	-4953.07	-5882.18
C	-5343.61	-5366.84	-9897.24	-5639.02	-5083.22	-5509.1	-5502.26	-5350.08	-5254.91	-7612.42	-7357.5	-5655.76
D	-5688.69	-5909.81	-5331.75	-5015.97	-9861.97	-5913.91	-5319.78	-5938.69	-6044.11	-7027.06	-6923.74	-5384.25
E	-6587.39	-6468.97	-5337.14	-5224.92	-5104.32	-5745.7	-5246.7	-5681.16	-5056.59	-5970.61	-6055.17	-7314.46
F	-7513.96	-8330.93	-7762.17	-4962.56	-5349.6	-5162.5	-5485.97	-5641.49	-5056.96	-5412.56	-5955.13	-6955.07
G	-8373.66	-8315.14	-8562.31	-5390.15	-4768.49	-5069.01	-5659.82	-5951.54	-5458.87	-7810.46	-7847.69	-6307.47
H	-9079.15	-9242.33	-9255.07	-5257.32	-4686.51	-5309.48	-5282.99	-5610.08	-6008.84	-7103.97	-7265.12	-6562.5
CALCULATION OPERATION	4	Standard Curve
OUTPUT NAME	Concentration
CALCULATION OPERATION DETAILS
INPUT	Blank Correction
FIT METHOD	Four-parameter logistic
WEIGHTING METHOD	Weighted 1/y²
ERROR BARS	No
X-AXIS DETAILS
TITLE	Concentration
AUTOSCALED	Yes
SCALING	Logarithmic
MINIMUM	Not defined
MAXIMUM	Not defined
Y-AXIS DETAILS
TITLE	Signal
AUTOSCALED	Yes
SCALING	Logarithmic
MINIMUM	Not defined
MAXIMUM	Not defined
CALCULATION OPERATION RESULTS
METHOD	Four-parameter logistic
FUNCTION	y = d + (a - d) / (1 + (x / c)^b)
FUNCTION PARAMETERS
a	-5321.16
b	1.14503
c	145.301
d	-9227.48
FORCED TO ZERO	No
FIT QUALITY
RSS	112090
R SQUARED	0.992171
ADJUSTED R SQUARED	0.990605
Dilution factor 100	665nm	620 nm	Ratio 665/620
B3B9	9358	27824	3363.28
	11139	29922	3722.68
control	13106	25886	5062.97
	13531.7	29061	4656.32
N297Q-B3B9	13391	25843.6	5181.55
	9892.03	18258	5417.91
LALA-B3B9	12300	23262	5287.59
	12223	22769	5368.26
Dilution factor 200
B3B9	9539	21827	4370.28
	11805	28686	4115.25
control	13242	24825	5334.14
	12632	23785	5310.91
N297Q-B3B9	11862	27008	5515.25
	10870	19709	5244.24
LALA-B3B9	12300	23262	5287.59
	12223	22769	5603.29
Dilution factor 400
B3B9	10880	30444	3573.77
	8751	25643	3412.63
control	12310	24674	4989.06
	19095.3	34818	5484.31
N297Q-B3B9	11335	22589	5244.24
	10066	17947	5608.74
LALA-B3B9	16772	30758	5452.89
	13840	27276	5074.06
