# Supplementary material for: Dissecting antibody-dependent enhancement modulation by Fc-modified cross-neutralizing human monoclonal antibody
Source: PeerJ. 2025 Nov 19;13:e20329. doi: 10.7717/peerj.20329 (PMC12640126; doi:10.7717/peerj.20329)
Supplement: Supplemental Information 2 [file peerj-13-20329-s002.xlsx]

## Sheet: DV1
LALA
Ab conc.	FFU(1)	FFU(2)	average	Reduction rate			average	SD
64	41	55		62.037	49.0741	64	55.5556	6.48148
32	39	63		63.8889	41.6667	32	48.3582	11.1111
16	52	61		51.8519	43.5185	16	41.194	4.16667
8	61	78		43.5185	27.7778	8	35.5224	7.87037
4	73	78		32.4074	27.7778	4	28.9552	2.31481
2	87	77		19.4444	28.7037	2	22.9851	4.62963
1	86	77		20.3704	28.7037	1	22.0896	4.16667
0.5	82	84		24.0741	22.2222	0.5	26.5672	0.925926
0.25	78	85		27.7778	21.2963	0.25	18.806	3.24074
0.125	87	97		19.4444	10.1852	0.125	8.95522	4.62963
0.0625	93	91		13.8889	15.7407	0.0625	11.0448	0.925926
0	103	113	108			0	0
N297
Ab conc.	FFU(1)	FFU(2)	average	Reduction rate			average	SD
64	7	4		86.1386	92.0792	64	89.1089	2.9703
32	20	14		60.396	72.2772	32	66.3366	5.94059
16	18	20		64.3564	60.396	16	62.3762	1.9802
8	20	19		60.396	62.3762	8	61.3861	0.990099
4	26	21		48.5149	58.4158	4	53.4653	4.9505
2	33	25		34.6535	50.495	2	42.5743	7.92079
1	40	40		20.7921	20.7921	1	20.7921	0
0.5	43	45		14.8515	10.8911	0.5	12.8713	1.9802
0.25	45	43		10.8911	14.8515	0.25	12.8713	1.9802
0.125	44	47		12.8713	6.93069	0.125	9.90099	2.9703
0.0625	49	49		2.9703	2.9703	0.0625	2.9703	0
0	47	54	50.5

## Sheet: DV2
LALA
Ab conc.	FFU(1)	FFU(2)	average	Reduction rate			average	SD
64	0	0		100	100	64	100	0
32	0	0		100	100	32	100	0
16	0	0		100	100	16	100	0
8	0	0		100	100	8	100	0
4	2	7		97.7143	92	4	94.8571	2.85714
2	14	14		84	84	2	84	0
1	22	36		74.8571	58.8571	1	66.8571	8
0.5	56	63		36	28	0.5	32	4
0.25	68	63		22.2857	28	0.25	25.1429	2.85714
0.125	69	73		21.1429	16.5714	0.125	18.8571	2.28571
0.0625	84	76		4	13.1429	0.0625	8.57143	4.57143
0	90	85	87.5			0	0
N297
Ab conc.	FFU(1)	FFU(2)	average	Reduction rate			average	SD
64	0	0		100	100	64	100	0
32	0	0		100	100	32	100	0
16	2	1		96.4286	98.2143	16	97.3214	0.892857
8	0	0		100	100	8	100	0
4	0	0		100	100	4	100	0
2	0	0		100	100	2	100	0
1	8	6		85.7143	89.2857	1	87.5	1.78571
0.5	30	20		46.4286	64.2857	0.5	55.3571	8.92857
0.25	35	30		37.5	46.4286	0.25	41.9643	4.46429
0.125	40	41		28.5714	26.7857	0.125	27.6786	0.892857
0.0625	55	52		1.78571	7.14286	0.0625	4.46429	2.67857
0	52	60	56

## Sheet: DV3
LALA
Ab conc.	FFU(1)	FFU(2)	average	Reduction rate			average	SD
64	7	9		95.2862	93.9394	64	94.6128	0.673401
32	35	19		76.431	87.2054	32	81.8182	5.38721
16	44	34		70.3704	77.1044	16	73.7374	3.367
8	52	54		64.9832	63.6364	8	64.3098	0.673401
4	69	58		53.5354	60.9428	4	57.2391	3.7037
2	97	88		34.6801	40.7407	2	37.7104	3.0303
1	99	105		33.3333	29.2929	1	31.3131	2.0202
0.5	97	88		34.6801	40.7407	0.5	37.7104	3.0303
0.25	88	101		40.7407	31.9865	0.25	36.3636	4.3771
0.125	100	105		32.6599	29.2929	0.125	30.9764	1.6835
0.0625	120	108		19.1919	27.2727	0.0625	23.2323	4.0404
0	146	151	148.5			0	0
N297
Ab conc.	FFU(1)	FFU(2)	average	Reduction rate			average	SD
64	9	6		88.6792	92.4528	64	90.566	1.88679
32	11	13		86.1635	83.6478	32	84.9057	1.25786
16	16	16		79.8742	79.8742	16	79.8742	0
8	10	25		87.4214	68.5535	8	77.9874	9.43396
4	27	31		66.0377	61.0063	4	63.522	2.51572
2	37	40		53.4591	49.6855	2	51.5723	1.88679
1	36	47		54.717	40.8805	1	47.7987	6.91824
0.5	46	49		42.1384	38.3648	0.5	40.2516	1.88679
0.25	49	46		38.3648	42.1384	0.25	40.2516	1.88679
0.125	47	50		40.8805	37.1069	0.125	38.9937	1.88679
0.0625	50	57		37.1069	28.3019	0.0625	32.7044	4.40252
0	75	84	79.5

## Sheet: DV4
LALA
Ab conc.	FFU(1)	FFU(2)	average	Reduction rate			average	SD
64	0	0		100	100	64	100	0
32	0	0		100	100	32	100	0
16	0	0		100	100	16	100	0
8	1	0		98.3193	100	8	99.1597	0.840336
4	5	2		91.5966	96.6387	4	94.1176	2.52101
2	13	9		78.1513	84.8739	2	81.5126	3.36134
1	33	20		44.5378	66.3866	1	55.4622	10.9244
0.5	50	37		15.9664	37.8151	0.5	26.8908	10.9244
0.25	46	43		22.6891	27.7311	0.25	25.2101	2.52101
0.125	42	47		29.4118	21.0084	0.125	25.2101	4.20168
0.0625	48	55		19.3277	7.56303	0.0625	13.4454	5.88235
0	61	58	59.5			0	0
N297
Ab conc.	FFU(1)	FFU(2)	average	Reduction rate			average	SD
64	0	4		100	94.4056	64	97.2028	2.7972
32	5	1		93.007	98.6014	32	95.8042	2.7972
16	8	4		88.8112	94.4056	16	91.6084	2.7972
8	22	32		69.2308	55.2448	8	62.2378	6.99301
4	42	42		41.2587	41.2587	4	41.2587	0
2	58	57		18.8811	20.2797	2	19.5804	0.699301
1	61	60		14.6853	16.0839	1	15.3846	0.699301
0.5	68	67		4.8951	6.29371	0.5	5.59441	0.699301
0.25	67	68		6.29371	4.8951	0.25	5.59441	0.699301
0.125	65	59		9.09091	17.4825	0.125	13.2867	4.1958
0.0625	56	65		21.6783	9.09091	0.0625	15.3846	6.29371
0	68	75	71.5
