# Supplementary material for: Dissecting antibody-dependent enhancement modulation by Fc-modified cross-neutralizing human monoclonal antibody
Source: PeerJ. 2025 Nov 19;13:e20329. doi: 10.7717/peerj.20329 (PMC12640126; doi:10.7717/peerj.20329)
Supplement: Supplemental Information 6 [file peerj-13-20329-s006.xlsx]

## Sheet: DENV1
	1000	500	250	125	62.5	31.25	15.625	7.8125	3.9	1.95	Virus+cell+serum	Virus+Cell
LALA_1	0	7	10	12	6	4	12	13	44	28	77	5
	1	3	2	7	10	30	30	26	20	37	65	5
	3	1	7	3	13	14	21	25	23	36	55	4
LALA_1	3	8	2	3	12	29	20	32	69	53	79	2
	3	7	12	9	15	15	25	30	43	43	109	5
	5	6	1	17	13	13	19	27	61	52	78	4
N297Q_1	1	3	11	3	8	5	9	17	19	15	106	1
	3	5	3	5	3	5	6	11	15	26	58	2
	4	1	2	1	4	6	8	20	10	33	40	3
N297Q_1	7	7	5	3	5	7	9	12	22	35	45	10
	6	5	7	4	6	2	5	11	22	38	47	2
	7	1	2	4	5	6	1	12	20	25	89	3
WT_1	136	125	78	259	279	178	114	65	70	182	70	2
	123	112	297	387	156	185	102	91	80	104	75	4
	88	100	116	172	316	180	120	79	73	102	68	2
WT_1	108	152	204	322	317	151	121	105	106	78	140	3
	93	155	304	272	213	169	217	69	106	131	151	3
	158	189	205	276	279	263	265	94	78	157	148	2
	1000	500	250	125	62.5	31.25	15.625	7.8125	3.9	1.95	Virus+cell+serum	Virus+Cell
LALA_1	0	1077.02	1538.6	1846.32	923.16	615.44	1846.32	2000.18	6769.84	4308.08	11847.2	769.3
	153.86	461.58	307.72	1077.02	1538.6	4615.8	4615.8	4000.36	3077.2	5692.82	10000.9	769.3
	461.58	153.86	1077.02	461.58	2000.18	2154.04	3231.06	3846.5	3538.78	5538.96	8462.3	615.44
LALA_1	461.58	1230.88	307.72	461.58	1846.32	4461.94	3077.2	4923.52	10616.3	8154.58	12154.9	307.72
	461.58	1077.02	1846.32	1384.74	2307.9	2307.9	3846.5	4615.8	6615.98	6615.98	16770.7	769.3
	769.3	923.16	153.86	2615.62	2000.18	2000.18	2923.34	4154.22	9385.46	8000.72	12001.1	615.44
N297Q_1	153.86	461.58	1692.46	461.58	1230.88	769.3	1384.74	2615.62	2923.34	2307.9	16309.2	153.86
	461.58	769.3	461.58	769.3	461.58	769.3	923.16	1692.46	2307.9	4000.36	8923.88	307.72
	615.44	153.86	307.72	153.86	615.44	923.16	1230.88	3077.2	1538.6	5077.38	6154.4	461.58
N297Q_1	1077.02	1077.02	769.3	461.58	769.3	1077.02	1384.74	1846.32	3384.92	5385.1	6923.7	1538.6
	923.16	769.3	1077.02	615.44	923.16	307.72	769.3	1692.46	3384.92	5846.68	7231.42	307.72
	1077.02	153.86	307.72	615.44	769.3	923.16	153.86	1846.32	3077.2	3846.5	13693.5	461.58
WT_1	20925	19232.5	12001.1	39849.7	42926.9	27387.1	17540	10000.9	10770.2	28002.5	10770.2	307.72
	18924.8	17232.3	45696.4	59543.8	24002.2	28464.1	15693.7	14001.3	12308.8	16001.4	11539.5	615.44
	13539.7	15386	17847.8	26463.9	48619.8	27694.8	18463.2	12154.9	11231.8	15693.7	10462.5	307.72
WT_1	16616.9	23386.7	31387.4	49542.9	48773.6	23232.9	18617.1	16155.3	16309.2	12001.1	21540.4	461.58
	14309	23848.3	46773.4	41849.9	32772.2	26002.3	33387.6	10616.3	16309.2	20155.7	23232.9	461.58
	24309.9	29079.5	31541.3	42465.4	42926.9	40465.2	40772.9	14462.8	12001.1	24156	22771.3	307.72
	1000	500	250	125	62.5	31.25	15.625	7.8125	3.9	1.95	Virus+cell+serum	Virus+Cell
LALA_1	0	9.09091	12.987	15.5844	7.79221	5.19481	15.5844	16.8831	57.1429	36.3636	100	6.49351
	1.53846	4.61538	3.07692	10.7692	15.3846	46.1538	46.1538	40	30.7692	56.9231	100	7.69231
	5.45455	1.81818	12.7273	5.45455	23.6364	25.4545	38.1818	45.4545	41.8182	65.4545	100	7.27273
LALA_1	3.79747	10.1266	2.53165	3.79747	15.1899	36.7089	25.3165	40.5063	87.3418	67.0886	100	2.53165
	2.75229	6.42202	11.0092	8.25688	13.7615	13.7615	22.9358	27.5229	39.4495	39.4495	100	4.58716
	6.41026	7.69231	1.28205	21.7949	16.6667	16.6667	24.359	34.6154	78.2051	66.6667	100	5.12821
N297Q_1	0.943396	2.83019	10.3774	2.83019	7.54717	4.71698	8.49057	16.0377	17.9245	14.1509	100	0.943396
	5.17241	8.62069	5.17241	8.62069	5.17241	8.62069	10.3448	18.9655	25.8621	44.8276	100	3.44828
	10	2.5	5	2.5	10	15	20	50	25	82.5	100	7.5
N297Q_1	15.5556	15.5556	11.1111	6.66667	11.1111	15.5556	20	26.6667	48.8889	77.7778	100	22.2222
	12.766	10.6383	14.8936	8.51064	12.766	4.25532	10.6383	23.4043	46.8085	80.8511	100	4.25532
	7.86517	1.1236	2.24719	4.49438	5.61798	6.74157	1.1236	13.4831	22.4719	28.0899	100	3.37079
WT_1	194.286	178.571	111.429	370	398.571	254.286	162.857	92.8571	100	260	100	2.85714
	164	149.333	396	516	208	246.667	136	121.333	106.667	138.667	100	5.33333
	129.412	147.059	170.588	252.941	464.706	264.706	176.471	116.176	107.353	150	100	2.94118
WT_1	77.1429	108.571	145.714	230	226.429	107.857	86.4286	75	75.7143	55.7143	100	2.14286
	61.5894	102.649	201.325	180.132	141.06	111.921	143.709	45.6954	70.1987	86.755	100	1.98675
	106.757	127.703	138.514	186.486	188.514	177.703	179.054	63.5135	52.7027	106.081	100	1.35135
	1000	500	250	125	62.5	31.25	15.625	7.8125	3.9	1.95	Virus+cell+serum	Virus+Cell
LALA_1	2.331	5.17483	9.59707	10.6027	15.6044	25.6011	33.3067	34.1126	43.2434	52.9138	100	7.15285
	4.32001	8.0803	4.94096	11.2831	15.206	22.379	24.2037	34.2149	68.3321	57.7349	100	4.08234
N207Q_1	5.37194	4.65029	6.84992	4.65029	7.57319	9.44589	12.9451	28.3344	22.9289	47.1595	100	3.96389
	12.0622	9.10582	9.41731	6.55723	9.83168	8.85082	10.5873	21.1847	39.3898	62.2396	100	9.94944
WT_1	162.566	158.321	226.006	379.647	357.092	255.219	158.443	110.122	104.673	182.889	100	3.71055
	81.8297	112.974	161.851	198.873	185.334	132.493	136.397	61.403	66.2052	82.8501	100	1.82699
Control	Mean		Mean	SD	Mean+SD	Mean-SD
10103.5	12821.7	78.8	100	35.4145	135.414	64.5855
13642.3		106.4
10462.5		81.6
9282.89		72.4
10924.1		85.2
22514.8		175.6

## Sheet: DENV2
	1000	500	250	125	62.5	31.25	15.625	7.8125	3.9	1.95	Virus+cell+serum	Virus+Cell
LALA_1	1	1	1	1	1	1	2	2	5	2	66	4
	1	1	1	1	1	1	1	2	1	1	47	4
	1	1	1	1	1	1	1	1	1	2	61	2
LALA_1	1	1	1	1	1	1	1	1	1	3	65	1
	1	1	1	1	1	1	1	1	2	4	54	4
	1	1	1	1	1	1	1	1	2	2	57	2
N297Q_1	1	1	1	1	1	1	1	2	3	9	47	2
	1	1	1	1	1	1	1	1	3	1	34	7
	1	1	1	1	1	1	1	2	1	2	35	1
N297Q_1	1	1	1	1	1	1	1	2	1	9	40	5
	1	1	1	1	1	1	1	2	2	1	65	3
	1	1	1	1	1	1	1	1	1	1	71	9
WT_1	1	1	1	4	7	13	21	31	34	44	60	4
	1	1	1	2	4	18	18	28	24	26	78	7
	1	1	1	1	6	11	13	25	35	36	46	9
WT_1	2	1	2	5	7	19	10	25	39	41	38	13
	1	1	1	2	6	17	18	35	45	36	61	19
	1	1	1	2	6	19	29	32	30	33	64	3
	1000	500	250	125	62.5	31.25	15.625	7.8125	3.9	1.95	Virus+cell+serum	Virus+Cell
LALA_1	153.86	153.86	153.86	153.86	153.86	153.86	307.72	307.72	769.3	307.72	10154.8	615.44
	153.86	153.86	153.86	153.86	153.86	153.86	153.86	307.72	153.86	153.86	7231.42	615.44
	153.86	153.86	153.86	153.86	153.86	153.86	153.86	153.86	153.86	307.72	9385.46	307.72
LALA_1	153.86	153.86	153.86	153.86	153.86	153.86	153.86	153.86	153.86	461.58	10000.9	153.86
	153.86	153.86	153.86	153.86	153.86	153.86	153.86	153.86	307.72	615.44	8308.44	615.44
	153.86	153.86	153.86	153.86	153.86	153.86	153.86	153.86	307.72	307.72	8770.02	307.72
N297Q_1	153.86	153.86	153.86	153.86	153.86	153.86	153.86	307.72	461.58	1384.74	7231.42	307.72
	153.86	153.86	153.86	153.86	153.86	153.86	153.86	153.86	461.58	153.86	5231.24	1077.02
	153.86	153.86	153.86	153.86	153.86	153.86	153.86	307.72	153.86	307.72	5385.1	153.86
N297Q_1	153.86	153.86	153.86	153.86	153.86	153.86	153.86	307.72	153.86	1384.74	6154.4	769.3
	153.86	153.86	153.86	153.86	153.86	153.86	153.86	307.72	307.72	153.86	10000.9	461.58
	153.86	153.86	153.86	153.86	153.86	153.86	153.86	153.86	153.86	153.86	10924.1	1384.74
WT_1	153.86	153.86	153.86	615.44	1077.02	2000.18	3231.06	4769.66	5231.24	6769.84	9231.6	615.44
	153.86	153.86	153.86	307.72	615.44	2769.48	2769.48	4308.08	3692.64	4000.36	12001.1	1077.02
	153.86	153.86	153.86	153.86	923.16	1692.46	2000.18	3846.5	5385.1	5538.96	7077.56	1384.74
WT_1	307.72	153.86	307.72	769.3	1077.02	2923.34	1538.6	3846.5	6000.54	6308.26	5846.68	2000.18
	153.86	153.86	153.86	307.72	923.16	2615.62	2769.48	5385.1	6923.7	5538.96	9385.46	2923.34
	153.86	153.86	153.86	307.72	923.16	2923.34	4461.94	4923.52	4615.8	5077.38	9847.04	461.58
	1000	500	250	125	62.5	31.25	15.625	7.8125	3.9	1.95	Virus+cell+serum	Virus+Cell
LALA_1	1.51515	1.51515	1.51515	1.51515	1.51515	1.51515	3.0303	3.0303	7.57576	3.0303	100	6.06061
	2.12766	2.12766	2.12766	2.12766	2.12766	2.12766	2.12766	4.25532	2.12766	2.12766	100	8.51064
	1.63934	1.63934	1.63934	1.63934	1.63934	1.63934	1.63934	1.63934	1.63934	3.27869	100	3.27869
LALA_1	1.53846	1.53846	1.53846	1.53846	1.53846	1.53846	1.53846	1.53846	1.53846	4.61538	100	1.53846
	1.85185	1.85185	1.85185	1.85185	1.85185	1.85185	1.85185	1.85185	3.7037	7.40741	100	7.40741
	1.75439	1.75439	1.75439	1.75439	1.75439	1.75439	1.75439	1.75439	3.50877	3.50877	100	3.50877
N297Q_1	2.12766	2.12766	2.12766	2.12766	2.12766	2.12766	2.12766	4.25532	6.38298	19.1489	100	4.25532
	2.94118	2.94118	2.94118	2.94118	2.94118	2.94118	2.94118	2.94118	8.82353	2.94118	100	20.5882
	2.85714	2.85714	2.85714	2.85714	2.85714	2.85714	2.85714	5.71429	2.85714	5.71429	100	2.85714
N297Q_1	2.5	2.5	2.5	2.5	2.5	2.5	2.5	5	2.5	22.5	100	12.5
	1.53846	1.53846	1.53846	1.53846	1.53846	1.53846	1.53846	3.07692	3.07692	1.53846	100	4.61538
	1.40845	1.40845	1.40845	1.40845	1.40845	1.40845	1.40845	1.40845	1.40845	1.40845	100	12.6761
WT_1	1.66667	1.66667	1.66667	6.66667	11.6667	21.6667	35	51.6667	56.6667	73.3333	100	6.66667
	1.28205	1.28205	1.28205	2.5641	5.12821	23.0769	23.0769	35.8974	30.7692	33.3333	100	8.97436
	2.17391	2.17391	2.17391	2.17391	13.0435	23.913	28.2609	54.3478	76.087	78.2609	100	19.5652
WT_1	5.26316	2.63158	5.26316	13.1579	18.4211	50	26.3158	65.7895	102.632	107.895	100	34.2105
	1.63934	1.63934	1.63934	3.27869	9.83607	27.8689	29.5082	57.377	73.7705	59.0164	100	31.1475
	1.5625	1.5625	1.5625	3.125	9.375	29.6875	45.3125	50	46.875	51.5625	100	4.6875
	1000	500	250	125	62.5	31.25	15.625	7.8125	3.9	1.95	Virus+cell+serum	Virus+Cell
LALA_1	1.76072	1.76072	1.76072	1.76072	1.76072	1.76072	2.26577	2.97499	3.78092	2.81222	100	5.94998
	1.7149	1.7149	1.7149	1.7149	1.7149	1.7149	1.7149	1.7149	2.91698	5.17719	100	4.15155
N297Q_1	2.64199	2.64199	2.64199	2.64199	2.64199	2.64199	2.64199	4.30359	6.02122	9.26813	100	9.23357
	1.81564	1.81564	1.81564	1.81564	1.81564	1.81564	1.81564	3.16179	2.32846	8.4823	100	9.93048
WT_1	1.70754	1.70754	1.70754	3.80156	9.94612	22.8855	28.7793	47.304	54.5076	61.6425	100	11.7354
	2.82167	1.94447	2.82167	6.52053	12.544	35.8521	33.7122	57.7222	74.4257	72.8245	100	23.3485
Control	Mean		Mean	SD	Mean+SD	Mean-SD
8923.88	8453.75	105.561	100	13.765	113.765	86.235
9026.45		106.775
5949.25		70.3741
9026.45		106.775
9436.75		111.628
8359.73		98.8878

## Sheet: DENV3
	1000	500	250	125	62.5	31.25	15.625	7.8125	3.9	1.95	Virus+cell+serum	Virus+Cell
LALA_1	1	1	2	2	4	4	5	5	8	29	53	14
	1	1	1	1	1	3	7	6	7	49	59	2
	1	1	1	1	2	2	7	8	26	26	50	20
LALA_1	1	1	2	1	1	4	6	16	23	48	62	1
	1	1	1	2	1	5	4	11	19	37	71	2
	1	1	1	1	7	4	5	11	11	40	61	1
N297Q_1	1	1	1	1	1	2	1	3	6	26	44	1
	1	1	1	1	1	2	4	1	16	33	73	1
	1	1	1	1	1	4	6	6	8	24	62	2
N297Q_1	1	1	2	2	2	2	1	5	7	19	73	6
	1	1	1	2	1	3	1	4	18	24	47	6
	1	1	1	1	1	1	4	4	5	10	49	1
WT_1	1	2	1	3	17	63	106	132	291	352	89	1
	1	1	5	4	28	55	78	194	301	396	39	1
	1	2	4	15	10	61	90	117	236	377	47	1
WT_1	1	2	3	12	33	59	64	205	335	317	51	1
	1	4	3	4	26	85	97	186	370	362	63	12
	1	3	5	13	20	99	85	223	347	425	96	9
	1000	500	250	125	62.5	31.25	15.625	7.8125	3.9	1.95	Virus+cell+serum	Virus+Cell
LALA_1	153.86	153.86	307.72	307.72	615.44	615.44	769.3	769.3	1230.88	4461.94	8154.58	2154.04
	153.86	153.86	153.86	153.86	153.86	461.58	1077.02	923.16	1077.02	7539.14	9077.74	307.72
	153.86	153.86	153.86	153.86	307.72	307.72	1077.02	1230.88	4000.36	4000.36	7693	3077.2
LALA_1	153.86	153.86	307.72	153.86	153.86	615.44	923.16	2461.76	3538.78	7385.28	9539.32	153.86
	153.86	153.86	153.86	307.72	153.86	769.3	615.44	1692.46	2923.34	5692.82	10924.1	307.72
	153.86	153.86	153.86	153.86	1077.02	615.44	769.3	1692.46	1692.46	6154.4	9385.46	153.86
N297Q_1	153.86	153.86	153.86	153.86	153.86	307.72	153.86	461.58	923.16	4000.36	6769.84	153.86
	153.86	153.86	153.86	153.86	153.86	307.72	615.44	153.86	2461.76	5077.38	11231.8	153.86
	153.86	153.86	153.86	153.86	153.86	615.44	923.16	923.16	1230.88	3692.64	9539.32	307.72
N297Q_1	153.86	153.86	307.72	307.72	307.72	307.72	153.86	769.3	1077.02	2923.34	11231.8	923.16
	153.86	153.86	153.86	307.72	153.86	461.58	153.86	615.44	2769.48	3692.64	7231.42	923.16
	153.86	153.86	153.86	153.86	153.86	153.86	615.44	615.44	769.3	1538.6	7539.14	153.86
WT_1	153.86	307.72	153.86	461.58	2615.62	9693.18	16309.2	20309.5	44773.3	54158.7	13693.5	153.86
	153.86	153.86	769.3	615.44	4308.08	8462.3	12001.1	29848.8	46311.9	60928.6	6000.54	153.86
	153.86	307.72	615.44	2307.9	1538.6	9385.46	13847.4	18001.6	36311	58005.2	7231.42	153.86
WT_1	153.86	307.72	461.58	1846.32	5077.38	9077.74	9847.04	31541.3	51543.1	48773.6	7846.86	153.86
	153.86	615.44	461.58	615.44	4000.36	13078.1	14924.4	28618	56928.2	55697.3	9693.18	1846.32
	153.86	461.58	769.3	2000.18	3077.2	15232.1	13078.1	34310.8	53389.4	65390.5	14770.6	1384.74
	1000	500	250	125	62.5	31.25	15.625	7.8125	3.9	1.95	Virus+cell+serum	Virus+Cell
LALA_1	1.88679	1.88679	3.77358	3.77358	7.54717	7.54717	9.43396	9.43396	15.0943	54.717	100	26.4151
	1.69492	1.69492	1.69492	1.69492	1.69492	5.08475	11.8644	10.1695	11.8644	83.0508	100	3.38983
	2	2	2	2	4	4	14	16	52	52	100	40
LALA_1	1.6129	1.6129	3.22581	1.6129	1.6129	6.45161	9.67742	25.8065	37.0968	77.4194	100	1.6129
	1.40845	1.40845	1.40845	2.8169	1.40845	7.04225	5.6338	15.493	26.7606	52.1127	100	2.8169
	1.63934	1.63934	1.63934	1.63934	11.4754	6.55738	8.19672	18.0328	18.0328	65.5738	100	1.63934
N297Q_1	2.27273	2.27273	2.27273	2.27273	2.27273	4.54545	2.27273	6.81818	13.6364	59.0909	100	2.27273
	1.36986	1.36986	1.36986	1.36986	1.36986	2.73973	5.47945	1.36986	21.9178	45.2055	100	1.36986
	1.6129	1.6129	1.6129	1.6129	1.6129	6.45161	9.67742	9.67742	12.9032	38.7097	100	3.22581
N297Q_1	1.36986	1.36986	2.73973	2.73973	2.73973	2.73973	1.36986	6.84932	9.58904	26.0274	100	8.21918
	2.12766	2.12766	2.12766	4.25532	2.12766	6.38298	2.12766	8.51064	38.2979	51.0638	100	12.766
	2.04082	2.04082	2.04082	2.04082	2.04082	2.04082	8.16327	8.16327	10.2041	20.4082	100	2.04082
WT_1	1.1236	2.24719	1.1236	3.37079	19.1011	70.7865	119.101	148.315	326.966	395.506	100	1.1236
	2.5641	2.5641	12.8205	10.2564	71.7949	141.026	200	497.436	771.795	1015.38	100	2.5641
	2.12766	4.25532	8.51064	31.9149	21.2766	129.787	191.489	248.936	502.128	802.128	100	2.12766
WT_1	1.96078	3.92157	5.88235	23.5294	64.7059	115.686	125.49	401.961	656.863	621.569	100	1.96078
	1.5873	6.34921	4.7619	6.34921	41.2698	134.921	153.968	295.238	587.302	574.603	100	19.0476
	1.04167	3.125	5.20833	13.5417	20.8333	103.125	88.5417	232.292	361.458	442.708	100	9.375
	1000	500	250	125	62.5	31.25	15.625	7.8125	3.9	1.95	Virus+cell+serum	Virus+Cell
LALA_1	1.86057	1.86057	2.4895	2.4895	4.41403	5.54397	11.7661	11.8678	26.3196	63.2559	100	23.2683
	1.55357	1.55357	2.0912	2.02305	4.83225	6.68375	7.83598	19.7774	27.2967	65.0353	100	2.02305
N297Q_1	1.75183	1.75183	1.75183	1.75183	1.75183	4.57893	5.80987	5.95515	16.1525	47.6687	100	2.28947
	1.84611	1.84611	2.30273	3.01195	2.30273	3.72117	3.88693	7.84107	19.3637	32.4998	100	7.67532
WT_1	1.93845	3.0222	7.48492	15.1807	37.3909	113.866	170.197	298.229	533.63	737.673	100	1.93845
	1.52992	4.46526	5.2842	14.4734	42.2697	117.911	122.667	309.83	535.208	546.293	100	10.1278
Control	Mean		Mean	SD	Mean+SD	Mean-SD
8308.44	9308.53	89.2562	100	8.8655	108.866	91.1345
9949.61		106.887
9180.31		98.6226
8667.45		93.1129
8975.17		96.4187
10770.2		115.702

## Sheet: DENV4
	1000	500	250	125	62.5	31.25	15.625	7.8125	3.9	1.95	Virus+cell+serum	Virus+Cell
LALA_1	1	1	1	1	1	1	1	4	7	10	48	1
	1	1	1	1	1	1	1	2	5	6	20	3
	1	1	1	1	1	1	1	1	6	6	37	3
LALA_1	1	1	1	1	1	1	1	2	7	7	16	2
	1	1	1	1	1	1	1	2	8	8	41	1
	1	1	1	1	1	1	1	3	4	12	48	5
N297Q_1	1	1	1	1	1	1	1	1	2	1	30	1
	1	1	1	1	1	1	1	1	1	4	51	1
	1	1	1	1	1	1	1	2	2	4	73	2
N297Q_1	1	1	1	1	1	1	1	1	1	14	53	1
	1	1	1	1	1	1	2	1	2	1	50	8
	1	1	1	1	1	1	1	1	1	1	52	3
WT_1	1	1	1	1	1	18	25	30	62	96	85	1
	1	1	1	1	1	15	14	91	55	157	81	9
	1	1	1	1	1	22	20	35	80	117	95	4
WT_1	1	1	1	1	1	13	16	36	46	88	67	11
	1	1	1	1	1	7	13	59	88	115	44	8
	1	1	1	1	1	8	7	40	59	97	58	6
	1000	500	250	125	62.5	31.25	15.625	7.8125	3.9	1.95	Virus+cell+serum	Virus+Cell
LALA_1	153.86	153.86	153.86	153.86	153.86	153.86	153.86	615.44	1077.02	1538.6	7385.28	153.86
	153.86	153.86	153.86	153.86	153.86	153.86	153.86	307.72	769.3	923.16	3077.2	461.58
	153.86	153.86	153.86	153.86	153.86	153.86	153.86	153.86	923.16	923.16	5692.82	461.58
LALA_1	153.86	153.86	153.86	153.86	153.86	153.86	153.86	307.72	1077.02	1077.02	2461.76	307.72
	153.86	153.86	153.86	153.86	153.86	153.86	153.86	307.72	1230.88	1230.88	6308.26	153.86
	153.86	153.86	153.86	153.86	153.86	153.86	153.86	461.58	615.44	1846.32	7385.28	769.3
N297Q_1	153.86	153.86	153.86	153.86	153.86	153.86	153.86	153.86	307.72	153.86	4615.8	153.86
	153.86	153.86	153.86	153.86	153.86	153.86	153.86	153.86	153.86	615.44	7846.86	153.86
	153.86	153.86	153.86	153.86	153.86	153.86	153.86	307.72	307.72	615.44	11231.8	307.72
N297Q_1	153.86	153.86	153.86	153.86	153.86	153.86	153.86	153.86	153.86	2154.04	8154.58	153.86
	153.86	153.86	153.86	153.86	153.86	153.86	307.72	153.86	307.72	153.86	7693	1230.88
	153.86	153.86	153.86	153.86	153.86	153.86	153.86	153.86	153.86	153.86	8000.72	461.58
WT_1	153.86	153.86	153.86	153.86	153.86	2769.48	3846.5	4615.8	9539.32	14770.6	13078.1	153.86
	153.86	153.86	153.86	153.86	153.86	2307.9	2154.04	14001.3	8462.3	24156	12462.7	1384.74
	153.86	153.86	153.86	153.86	153.86	3384.92	3077.2	5385.1	12308.8	18001.6	14616.7	615.44
WT_1	153.86	153.86	153.86	153.86	153.86	2000.18	2461.76	5538.96	7077.56	13539.7	10308.6	1692.46
	153.86	153.86	153.86	153.86	153.86	1077.02	2000.18	9077.74	13539.7	17693.9	6769.84	1230.88
	153.86	153.86	153.86	153.86	153.86	1230.88	1077.02	6154.4	9077.74	14924.4	8923.88	923.16
	1000	500	250	125	62.5	31.25	15.625	7.8125	3.9	1.95	Virus+cell+serum	Virus+Cell
LALA_1	2.08333	2.08333	2.08333	2.08333	2.08333	2.08333	2.08333	8.33333	14.5833	20.8333	100	2.08333
	5	5	5	5	5	5	5	10	25	30	100	15
	2.7027	2.7027	2.7027	2.7027	2.7027	2.7027	2.7027	2.7027	16.2162	16.2162	100	8.10811
LALA_1	6.25	6.25	6.25	6.25	6.25	6.25	6.25	12.5	43.75	43.75	100	12.5
	2.43902	2.43902	2.43902	2.43902	2.43902	2.43902	2.43902	4.87805	19.5122	19.5122	100	2.43902
	2.08333	2.08333	2.08333	2.08333	2.08333	2.08333	2.08333	6.25	8.33333	25	100	10.4167
N297Q_1	3.33333	3.33333	3.33333	3.33333	3.33333	3.33333	3.33333	3.33333	6.66667	3.33333	100	3.33333
	1.96078	1.96078	1.96078	1.96078	1.96078	1.96078	1.96078	1.96078	1.96078	7.84314	100	1.96078
	1.36986	1.36986	1.36986	1.36986	1.36986	1.36986	1.36986	2.73973	2.73973	5.47945	100	2.73973
N297Q_1	1.88679	1.88679	1.88679	1.88679	1.88679	1.88679	1.88679	1.88679	1.88679	26.4151	100	1.88679
	2	2	2	2	2	2	4	2	4	2	100	16
	1.92308	1.92308	1.92308	1.92308	1.92308	1.92308	1.92308	1.92308	1.92308	1.92308	100	5.76923
WT_1	1.17647	1.17647	1.17647	1.17647	1.17647	21.1765	29.4118	35.2941	72.9412	112.941	100	1.17647
	1.23457	1.23457	1.23457	1.23457	1.23457	18.5185	17.284	112.346	67.9012	193.827	100	11.1111
	1.05263	1.05263	1.05263	1.05263	1.05263	23.1579	21.0526	36.8421	84.2105	123.158	100	4.21053
WT_1	1.49254	1.49254	1.49254	1.49254	1.49254	19.403	23.8806	53.7313	68.6567	131.343	100	16.4179
	2.27273	2.27273	2.27273	2.27273	2.27273	15.9091	29.5455	134.091	200	261.364	100	18.1818
	1.72414	1.72414	1.72414	1.72414	1.72414	13.7931	12.069	68.9655	101.724	167.241	100	10.3448
	1000	500	250	125	62.5	31.25	15.625	7.8125	3.9	1.95	Virus+cell+serum	Virus+Cell
LALA_1	3.26201	3.26201	3.26201	3.26201	3.26201	3.26201	3.26201	7.01201	18.5998	22.3498	100	8.39715
	3.59079	3.59079	3.59079	3.59079	3.59079	3.59079	3.59079	7.87602	23.8652	29.4207	100	8.4519
N297Q_1	2.22133	2.22133	2.22133	2.22133	2.22133	2.22133	2.22133	2.67795	3.78906	5.55197	100	2.67795
	1.93662	1.93662	1.93662	1.93662	1.93662	1.93662	2.60329	1.93662	2.60329	10.1127	100	7.88534
WT_1	1.15456	1.15456	1.15456	1.15456	1.15456	20.951	22.5828	61.494	75.0176	143.309	100	5.49937
	1.8298	1.8298	1.8298	1.8298	1.8298	16.3684	21.8317	85.5959	123.46	186.649	100	14.9815
Control	Mean		Mean	SD	Mean+SD	Mean-SD
5385.1	8111.84	66.3857	100	33.0272	133.027	66.9728
5385.1		66.3857
7898.15		97.3656
7949.43		97.9979
13385.8		165.016
8667.45		106.849
